# Supplementary material for: Effects of short-term exposure to linear anionic surfactants (SDBS, SLS and SDS) on anammox biomass activity
Source: Royal Society of Chemistry journal article supplement (doi:10.1039/c6ra06238e), 2016-01-01
Supplement: c6ra06238e1.pdf [file c6ra06238e1.pdf]

**Supporting Information:**

**Effects of short-term exposure to linear anionic surfactants (SDBS, SLS and SDS) on anammox biomass activity**

Sen Qiao\*, Nan Zheng, Tian Tian, Cong Yu, Jiti Zhou

Key Laboratory of Industrial Ecology and Environmental Engineering (Ministry of Education, China), School of Environmental Science and Technology, Dalian University of Technology, Dalian 116024, P.R. China

\*Corresponding author: e-mail: qscyj@mail.dlut.edu.cn.

Number of pages - 4

Number of figures - 2

**Batch tests**

Batch tests lasted for 16 hours and liquid samples were obtained using a sterile syringe and purged through 0.22 µm pore size membranes for NH<sub>4</sub>-N, NO<sub>2</sub>-N and

23 NO<sub>3</sub>-N measurements at 0, 3, 5, 7, 12, 16 h, respectively. Total nitrogen contained  
24 NH<sub>4</sub>-N, NO<sub>2</sub>-N and NO<sub>3</sub>-N. Two kinds of widely applied linear anionic surfactants,  
25 sodium dodecyl benzene sulfonate (SDBS), sodium lauryl sulfate (SLS) and sodium  
26 dodecyl sulfonate (SDS) were selected during the batch tests.

27

## 28 **Recovery tests**

29 Recovery tests were carried out with the anammox biomass exposed to SLS and SDS  
30 and lasted for 16 hours. Liquid samples were obtained using a sterile syringe and  
31 purged through 0.22 µm pore size membranes for NH<sub>4</sub>-N, NO<sub>2</sub>-N and NO<sub>3</sub>-N  
32 measurements at 0, 3, 5, 7, 12, 16 h, respectively. Total nitrogen contained NH<sub>4</sub>-N,  
33 NO<sub>2</sub>-N and NO<sub>3</sub>-N.

34

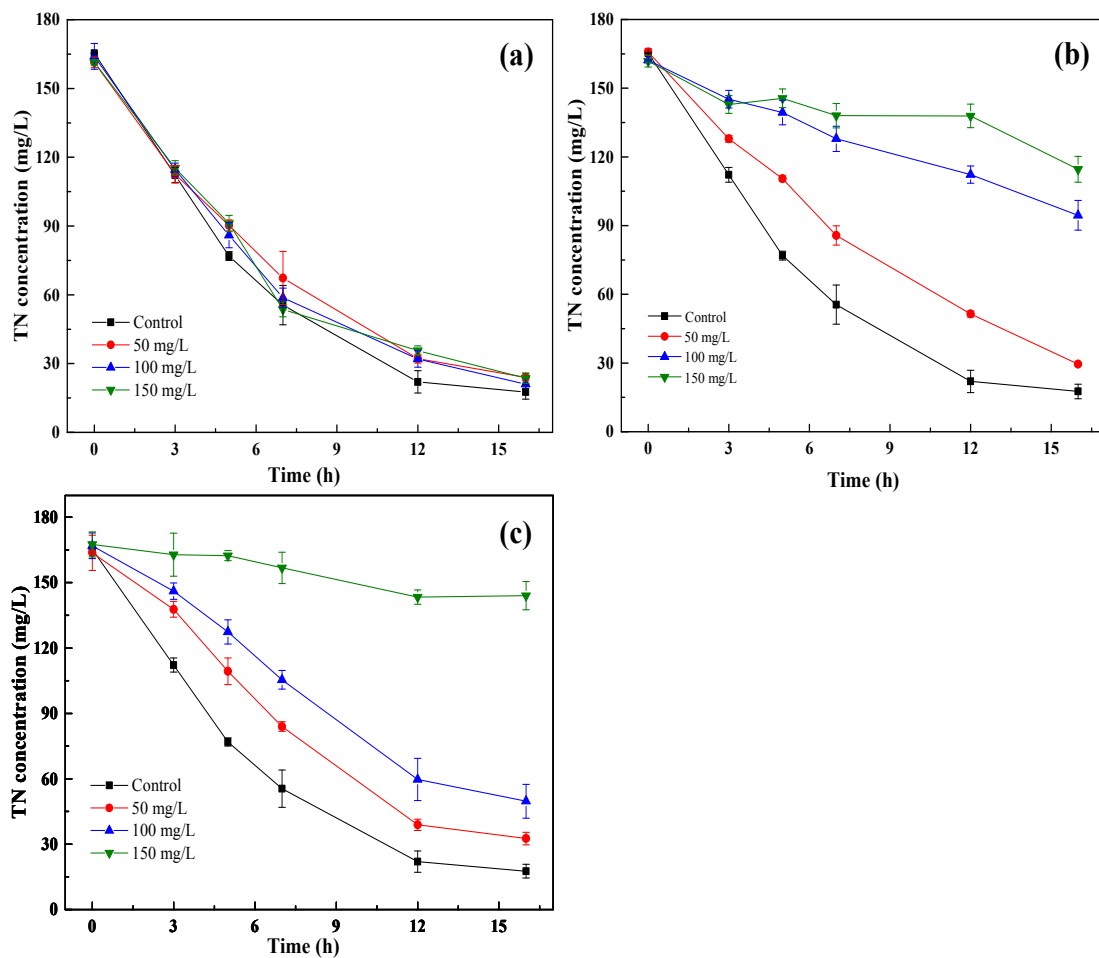

35  
 36 **Fig. S1** Comparison of TN removal performance of anammox biomass exposed to  
 37 different dosages of SDBS (a), SLS (b) and SDS (c) during the batch tests. Error bars  
 38 represent standard deviations of triplicate tests.

39

40

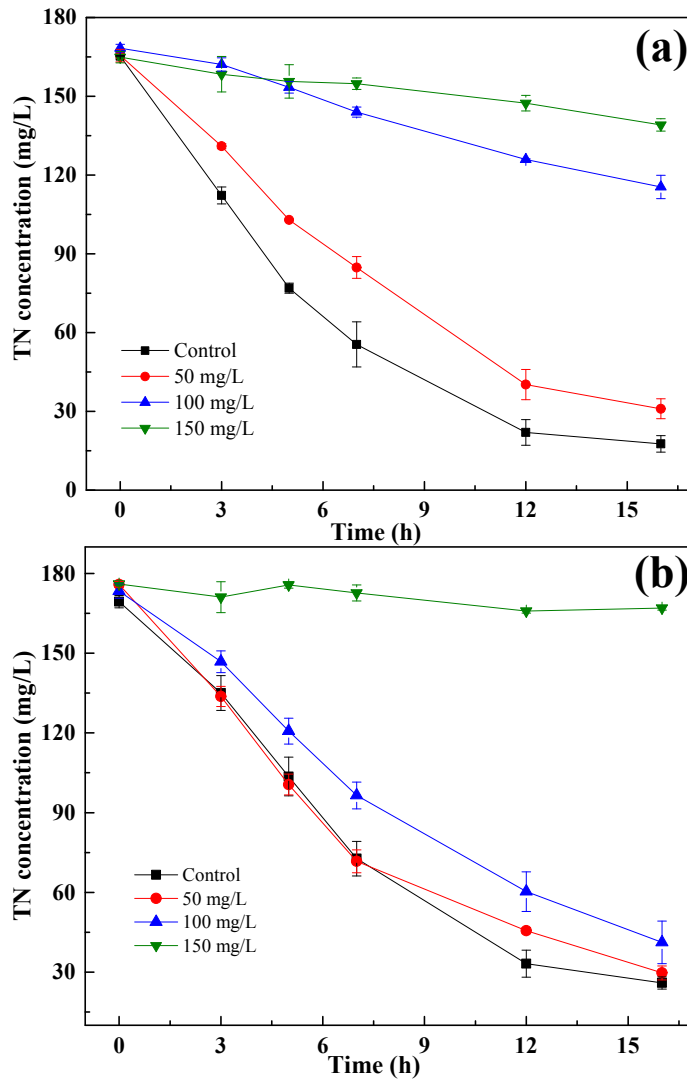

41  
 42 **Fig. S2** Comparison of TN removal performance of anammox biomass exposed to  
 43 different dosages of SLS (a) and SDS (b) during the recovery tests. Error bars  
 44 represent standard deviations of triplicate tests.

45
